# Supplementary material for: Risk factors for the development of neonatal sepsis in a neonatal intensive care unit of a tertiary care hospital of Nepal
Source: Research Square preprint supplement (doi:10.21203/rs.3.rs-122783/v1), 2020-12-15

## **Risk factors for the development of neonatal sepsis in a neonatal intensive care unit of a tertiary care hospital of Nepal**

Sulochana Manandhar <sup>1,2</sup>, Puja Amatya <sup>3</sup>, Imran Ansari <sup>3</sup>, Niva Joshi <sup>1</sup>, Nhukesh Maharjan <sup>1</sup>, Sabina Dongol <sup>1</sup>, Buddha Basnyat <sup>1</sup>, Sameer M. Dixit <sup>4</sup>, Stephen Baker <sup>5</sup> and Abhilasha Karkey <sup>1\*</sup>

<sup>1</sup> Oxford University Clinical Research Unit, Patan Academy of Health Sciences, Kathmandu, Nepal

<sup>2</sup> Centre for Tropical Medicine and Global Health, Medical sciences division, Nuffield Department of Medicine, University of Oxford, Linacre College, Oxford, UK

<sup>3</sup> Department of Pediatrics, Patan Academy of Health Sciences, Patan Hospital, Kathmandu, Nepal

<sup>4</sup> Center for Molecular Dynamics Nepal, Kathmandu, Nepal

<sup>5</sup> Cambridge Institute of Therapeutic Immunology & Infectious Disease (CITIID) Department of Medicine, University of Cambridge, Cambridge, UK

### **\*Correspondence**

Dr Abhilasha Karkey  
akarkey@oucru.org

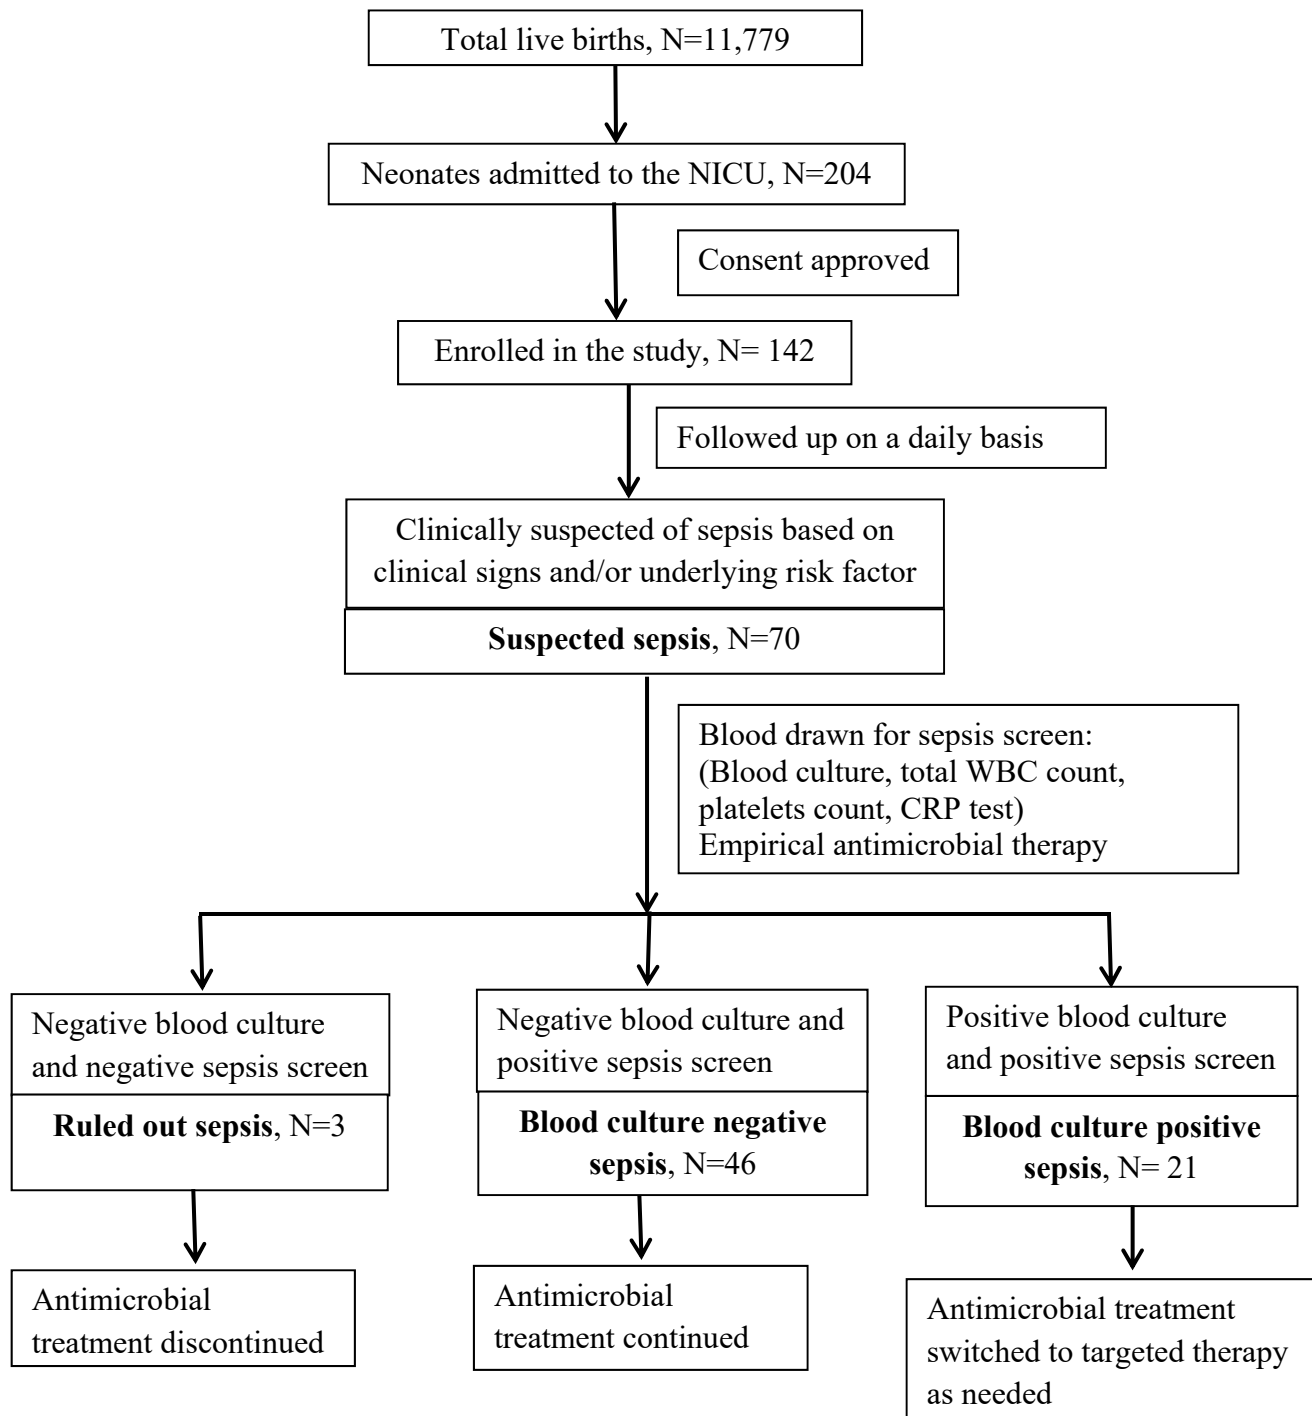

Supplement: Supplementary file 1 [file be35f95b07f051586e2c3da1.pdf]
