# Supplementary material for: Risk factors for the development of neonatal sepsis in a neonatal intensive care unit of a tertiary care hospital of Nepal
Source: Research Square preprint supplement (doi:10.21203/rs.3.rs-122783/v1), 2020-12-15
Supplement: Supplementary file 3 [file 83824ca53f2654f13b18d1ff.docx]

**Risk factors for the development of neonatal sepsis in a neonatal intensive care unit of a tertiary care hospital of Nepal**

Sulochana Manandhar 1,2, Puja Amatya 3, Imran Ansari 3, Niva Joshi 1, Nhukesh Maharjan 1,

Sabina Dongol 1, Buddha Basnyat 1, Sameer M. Dixit 4, Stephen Baker 5 and Abhilasha Karkey 1*

1 Oxford University Clinical Research Unit, Patan Academy of Health Sciences, Kathmandu, Nepal

2 Centre for Tropical Medicine and Global Health, Medical sciences division, Nuffield Department of Medicine, University of Oxford, Linacre College, Oxford, UK

3 Department of Pediatrics, Patan Academy of Health Sciences, Patan Hospital, Kathmandu, Nepal

4 Center for Molecular Dynamics Nepal, Kathmandu, Nepal

5 Cambridge Institute of Therapeutic Immunology & Infectious Disease (CITIID) Department of Medicine, University of Cambridge, Cambridge, UK

***Correspondence**

Dr Abhilasha Karkey

akarkey@oucru.org

**Additional file 4 Details of multiplex PCR for detection of resistance gene markers of ESBL and carbapenemase production**

| Genes | Primers | Primer sequence (5' - 3') | Primer final conc. | Anneal °C/sec | Product size (bp) | |
| --- | --- | --- | --- | --- | --- | --- |
| blaCTX-M1  (38) | CTX-M1F | AAAAATCACTGCGCCAGTTC | 0.1uM | 60°C/  40 sec | 415 |
| CTX-M1R | AGCTTATTCATCGCCACGTT | 0.1uM |
| blaCTX-M2  (38) | CTX-M2F | CGACGCTACCCCTGCTATT | 0.1uM | 552 |
| CTX-M2R | CCAGCGTCAGATTTTTCAGG | 0.1uM |
| blaCTX-M9  (38) | CTX-M9F | CAAAGAGAGTGCAACGGATG | 0.1uM | 205 |
| CTX-M9R | ATTGGAAAGCGTTCATCACC | 0.1uM |
| blaCTX-M8/25  (38) | CTX-M8F | TCGCGTTAAGCGGATGATGC | 0.1uM | 666/  327 |
| CTX-M25F | GCACGATGACATTCGGG | 0.1uM |
| CTX-M8/25R | AACCCACGATGTGGGTAGC | 0.2uM |
| blaTEM  (39) | TEM F | TGCGGTATTATCCCGTGTTG | 0.1uM | 57°C/  40 sec | 300 |
| TEM R | TCGTCGTTTGGTATGGCTTC | 0.1uM |
| blaSHV  (40) | MultiTSO-S_F | AGCCGCTTGAGCAAATTAAAC | 0.2uM | 713 |
| MultiTSO-S_R | ATCCCGCAGATAAATCACCAC | 0.2uM |
| blaOXA  (40) | MultiTSO-O_F | GGCACCAGATTCAACTTTCAAG | 0.2uM | 564 |
| MultiTSO-O_R | GACCCCAAGTTTCCTGTAAGTG | 0.2uM |
| blaKPC  (41) | KPC-F | CGTCTAGTTCTGCTGTCTTG | 0.2uM | 52°C/  40 sec | 798 |
| KPC-R | CTTGTCATCCTTGTTAGGCG | 0.2uM |
| blaNDM1  (42) | NDM-1F | GGTTTGGCGATCTGGTTTTC | 0.2uM | 621 |
| NDM-1R | CGGAATGGCTCATCACGATC | 0.2uM |
| blaOXA48  (41) | OXA-48-F | GCGTGGTTAAGGATGAACAC | 0.2uM | 438 |
| OXA-48-R | CATCAAGTTCAACCCAACCG | 0.2uM |
| blaOXA23  (43) | OXA-23-likeF | GATCGGATTGGAGAACCAGA | 0.2uM | 52°C/  40 sec | 501 |
| OXA-23-likeR | ATTTCTGACCGCATTTCCAT | 0.2uM |
| blaOXA24  (43) | OXA-24-likeF | GGTTAGTTGGCCCCCTTAAA | 0.2uM | 246 |
| OXA-24-likeR | AGTTGAGCGAAAAGGGGATT | 0.2uM |
| blaOXA51  (43) | OXA-51-likeF | TAATGCTTTGATCGGCCTTG | 0.2uM | 353 |
| OXA-51-likeR | TGGATTGCACTT CAT CTT GG | 0.2uM |
| blaOXA58  (43) | OXA-58-likeF | AAGTATTGGGGCTTGTGCTG | 0.2uM | 599 |
| OXA-58-likeR | CCCCTCTGCGCTCTACATAC | 0.2uM |
| blaNDM1  (43) | NDM-1F | GGTTTGGCGATCTGGTTTTC | 0.2uM | 61°C/  40 sec | 621 |
| NDM-1R | CGGAATGGCTCATCACGATC | 0.2uM |
